# Supplementary material for: Twin Peaks: more twinning in humans than ever before
Source: PubMed Central journal article supplement — Hum Reprod. 2021 Mar 12;36(6):1666–73. doi: 10.1093/humrep/deab029 (PMC8129593; doi:10.1093/humrep/deab029), 2021-03-12
Supplement: deab029_supplementary_figure_ii.pdf [file deab029_supplementary_figure_ii.pdf]

human reproduction SUPPLEMENTARY DATA

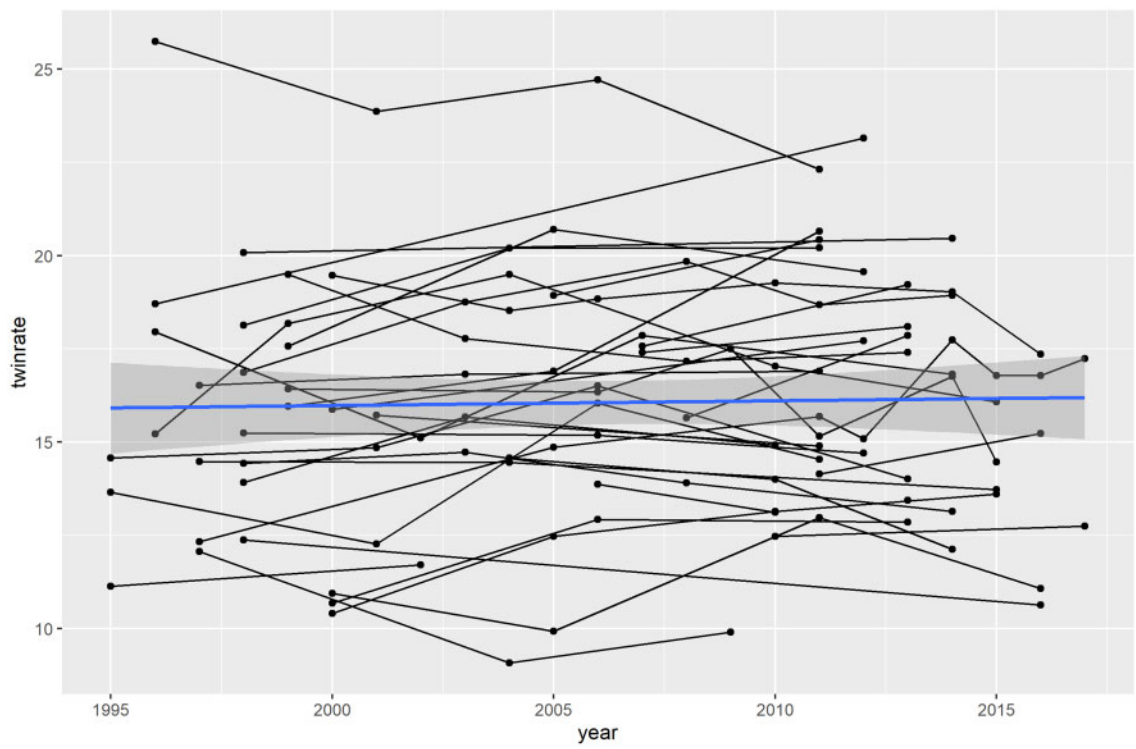

**Supplementary Figure S2.** Twin deliveries per 1000 total deliveries in the five years prior to the DHS interview by year of survey for 37 countries in Sub-Saharan Africa and regression line of twin rate on year. Note: Unstandardised regression coefficient of year is 0.0127 with 95%CI of -0.079 to 0.105.
