# Supplementary material for: Twin Peaks: more twinning in humans than ever before
Source: PubMed Central journal article supplement — Hum Reprod. 2021 Mar 12;36(6):1666–73. doi: 10.1093/humrep/deab029 (PMC8129593; doi:10.1093/humrep/deab029), 2021-03-12
Supplement: deab029_supplementary_table_i.pdf [file deab029_supplementary_table_i.pdf]

**Supplementary Table SI** Absolute and relative number of twin and all deliveries, in the world and by UN Geographic Regions,<sup>a</sup> in 1980–1985 and 2010–2015.

| Region               | Number of twin deliveries (thousands) |           | Share of all twin deliveries in the world |           | Total number of deliveries (thousands) |           | Share of all deliveries in the world |           | Twinning rate (twin deliveries per 1000 deliveries) |           |
|----------------------|---------------------------------------|-----------|-------------------------------------------|-----------|----------------------------------------|-----------|--------------------------------------|-----------|-----------------------------------------------------|-----------|
|                      | 1980–1985                             | 2010–2015 | 1980–1985                                 | 2010–2015 | 1980–1985                              | 2010–2015 | 1980–1985                            | 2010–2015 | 1980–1985                                           | 2010–2015 |
| North Europe         | 11                                    | 19        | 1%                                        | 1%        | 1,161                                  | 1,215     | 1%                                   | 1%        | 9.9                                                 | 15.8      |
| West Europe          | 20                                    | 33        | 2%                                        | 2%        | 2,046                                  | 1,908     | 2%                                   | 1%        | 9.9                                                 | 17.4      |
| South Europe         | 16                                    | 24        | 1%                                        | 1%        | 1,863                                  | 1,375     | 1%                                   | 1%        | 8.9                                                 | 17.8      |
| East Europe          | 41                                    | 36        | 4%                                        | 2%        | 4,873                                  | 3,380     | 4%                                   | 2%        | 8.6                                                 | 10.8      |
| Central Asia         | 9                                     | 13        | 1%                                        | 1%        | 1,413                                  | 1,579     | 1%                                   | 1%        | 6.6                                                 | 8.3       |
| West Asia            | 36                                    | 64        | 3%                                        | 4%        | 4,360                                  | 5,525     | 3%                                   | 4%        | 8.4                                                 | 11.7      |
| South Asia           | 272                                   | 323       | 23%                                       | 19%       | 36,858                                 | 37,125    | 29%                                  | 27%       | 7.4                                                 | 8.7       |
| East Asia            | 155                                   | 194       | 13%                                       | 12%       | 25,409                                 | 19,440    | 20%                                  | 14%       | 6.1                                                 | 10.0      |
| South-East Asia      | 82                                    | 97        | 7%                                        | 6%        | 11,965                                 | 11,765    | 9%                                   | 8%        | 6.9                                                 | 8.3       |
| Oceania <sup>b</sup> | 4                                     | 9         | 0%                                        | 1%        | 481                                    | 640       | 0%                                   | 0%        | 10.1                                                | 14.8      |
| North Africa         | 73                                    | 104       | 6%                                        | 6%        | 4,700                                  | 6,121     | 4%                                   | 4%        | 15.5                                                | 17.0      |
| West Africa          | 128                                   | 243       | 11%                                       | 15%       | 6,806                                  | 12,902    | 5%                                   | 9%        | 18.9                                                | 18.8      |
| Central Africa       | 48                                    | 105       | 4%                                        | 6%        | 2,679                                  | 5,952     | 2%                                   | 4%        | 18.2                                                | 17.7      |
| South Africa         | 13                                    | 21        | 1%                                        | 1%        | 1,250                                  | 1,377     | 1%                                   | 1%        | 10.9                                                | 15.4      |
| East Africa          | 109                                   | 200       | 9%                                        | 12%       | 7,247                                  | 13,205    | 6%                                   | 10%       | 15.0                                                | 15.2      |
| North America        | 38                                    | 71        | 3%                                        | 4%        | 3,937                                  | 4,251     | 3%                                   | 3%        | 9.9                                                 | 16.9      |
| Central America      | 29                                    | 34        | 2%                                        | 2%        | 3,301                                  | 3,327     | 3%                                   | 2%        | 8.8                                                 | 10.5      |
| Caribbean            | 8                                     | 8         | 1%                                        | 1%        | 825                                    | 742       | 1%                                   | 1%        | 9.7                                                 | 12.1      |
| South America        | 65                                    | 56        | 6%                                        | 3%        | 7,644                                  | 6,754     | 6%                                   | 5%        | 8.5                                                 | 8.4       |
| World                | 1 165                                 | 1 663     | 100%                                      | 100%      | 128,827                                | 138,590   | 100%                                 | 100%      | 9.1                                                 | 12.0      |

Notes: Own calculations.

<sup>a</sup><https://unstats.un.org/unsd/methodology/m49/>.<sup>b</sup>Oceania includes Australia, New Zealand, Melanesia, Micronesia and Polynesia.
