# Supplementary material for: Twin Peaks: more twinning in humans than ever before
Source: PubMed Central journal article supplement — Hum Reprod. 2021 Mar 12;36(6):1666–73. doi: 10.1093/humrep/deab029 (PMC8129593; doi:10.1093/humrep/deab029), 2021-03-12
Supplement: deab029_supplementary_table_ii.pdf [file deab029_supplementary_table_ii.pdf]

**Supplementary Table SII Sources and twin rates by country for 2010–2015.**

| Country | Twin rate | # years/surveys | Outside range | Source                                                                                                                                                                                                       |
|---------|-----------|-----------------|---------------|--------------------------------------------------------------------------------------------------------------------------------------------------------------------------------------------------------------|
| AFG     | 9.5       | 1               |               | Demographic and Health Surveys                                                                                                                                                                               |
| AGO     | 14.2      | 1               |               | Demographic and Health Surveys                                                                                                                                                                               |
| ALB     | 8.6       | 3               |               | United Nations Population Division                                                                                                                                                                           |
| ARG     | 9.6       | 3               |               | United Nations Population Division                                                                                                                                                                           |
| ARM     | 9.5       | 3               |               | National Bureau of Statistics (or Ministry)                                                                                                                                                                  |
| AUS     | 14.9      | 3               |               | National Bureau of Statistics (or Ministry)                                                                                                                                                                  |
| AUT     | 16.6      | 3               |               | National Bureau of Statistics (or Ministry)                                                                                                                                                                  |
| AZE     | 5.8       | 4               |               | United Nations Population Division                                                                                                                                                                           |
| BDI     | 13.1      | 1               |               | Demographic and Health Surveys                                                                                                                                                                               |
| BEL     | 18.5      | 1               |               | National Bureau of Statistics (or Ministry)                                                                                                                                                                  |
| BEN     | 24.2      | 1               |               | Demographic and Health Surveys                                                                                                                                                                               |
| BFA     | 19.1      | 1               |               | Demographic and Health Surveys                                                                                                                                                                               |
| BGD     | 7.7       | 1               |               | Demographic and Health Surveys                                                                                                                                                                               |
| BGR     | 15.7      | 3               |               | National Bureau of Statistics (or Ministry)                                                                                                                                                                  |
| BHR     | 18.1      | 4               |               | United Nations Population Division                                                                                                                                                                           |
| BIH     | 12.3      | 1               |               | United Nations Population Division                                                                                                                                                                           |
| BLR     | 9.7       | 3               |               | National Bureau of Statistics (or Ministry)                                                                                                                                                                  |
| BOL     | 6.6       | 1               |               | Demographic and Health Surveys                                                                                                                                                                               |
| BRA     | 9.5       | 5               |               | National Bureau of Statistics (or Ministry)                                                                                                                                                                  |
| BWA     | 11.8      | 1               | 2007          | Botswana Family Health Survey 2007/2008                                                                                                                                                                      |
| CAN     | 16.6      | 2               |               | National Bureau of Statistics (or Ministry)                                                                                                                                                                  |
| CHE     | 18.3      | 6               |               | National Bureau of Statistics (or Ministry)                                                                                                                                                                  |
| CHL     | 9.6       | 3               |               | National Bureau of Statistics (or Ministry)                                                                                                                                                                  |
| CHN     | 9.8       | 5               |               | Deng, C., <i>et al.</i> (2019). "Temporal trends in the birth rates and perinatal mortality of twins: A population-based study in China." <i>PLoS ONE</i> 14(1): e0209962. doi: 10.1371/journal.pone.0209962 |
| CIV     | 24.9      | 1               |               | Demographic and Health Surveys                                                                                                                                                                               |
| CMR     | 21.0      | 1               |               | Demographic and Health Surveys                                                                                                                                                                               |
| COD     | 18.7      | 1               |               | Demographic and Health Surveys                                                                                                                                                                               |
| COG     | 19.6      | 1               |               | Demographic and Health Surveys                                                                                                                                                                               |
| COL     | 7.2       | 1               |               | Demographic and Health Surveys                                                                                                                                                                               |
| COM     | 22.6      | 1               |               | Demographic and Health Surveys                                                                                                                                                                               |
| CRI     | 8.6       | 5               |               | National Bureau of Statistics (or Ministry)                                                                                                                                                                  |
| CUB     | 6.4       | 4               |               | United Nations Population Division                                                                                                                                                                           |
| CYP     | 24.1      | 4               |               | United Nations Population Division                                                                                                                                                                           |
| CZE     | 18.3      | 5               |               | National Bureau of Statistics (or Ministry)                                                                                                                                                                  |
| DEU     | 17.7      | 5               |               | National Bureau of Statistics (or Ministry)                                                                                                                                                                  |
| DNK     | 20.7      | 5               |               | National Bureau of Statistics (or Ministry)                                                                                                                                                                  |
| DOM     | 10.3      | 1               |               | Demographic and Health Surveys                                                                                                                                                                               |
| DZA     | 11.9      | 1               |               | Pan Arab Project for Family Health Surveys                                                                                                                                                                   |
| ECU     | 5.0       | 1               | 2004          | Ecuador Reproductive Health Survey 2004                                                                                                                                                                      |
| EGY     | 18.8      | 1               |               | Demographic and Health Surveys                                                                                                                                                                               |

(continued)

**Supplementary Table SII Continued**

| Country | Twin rate | # years/surveys | Outside range | Source                                                                                                                                               |
|---------|-----------|-----------------|---------------|------------------------------------------------------------------------------------------------------------------------------------------------------|
| ESH     | 13.4      | 1               | 2003          | Demographic and Health Surveys and Smits, J. & Monden, C. W. S. Twinning across the Developing World. PLoS ONE 6, doi: 10.1371/journal.pone.0025239. |
| ESP     | 21.0      | 3               |               | National Bureau of Statistics (or Ministry)                                                                                                          |
| EST     | 15.6      | 5               |               | National Bureau of Statistics (or Ministry)                                                                                                          |
| ETH     | 13.1      | 1               |               | Demographic and Health Surveys                                                                                                                       |
| FIN     | 14.1      | 5               |               | National Bureau of Statistics (or Ministry)                                                                                                          |
| FRA     | 17.2      | 6               |               | National Bureau of Statistics (or Ministry)                                                                                                          |
| GAB     | 23.5      | 1               |               | Demographic and Health Surveys                                                                                                                       |
| GBR     | 15.9      | 3               |               | National Bureau of Statistics (or Ministry)                                                                                                          |
| GEO     | 11.2      | 3               |               | United Nations Population Division                                                                                                                   |
| GHA     | 24.8      | 1               |               | Multiple Indicator Cluster Surveys                                                                                                                   |
| GIN     | 22.7      | 1               |               | Demographic and Health Surveys                                                                                                                       |
| GMB     | 14.0      | 1               |               | Demographic and Health Surveys                                                                                                                       |
| GNB     | 18.8      | 1               |               | Multiple Indicator Cluster Surveys                                                                                                                   |
| GRC     | 24.2      | 4               |               | National Bureau of Statistics (or Ministry)                                                                                                          |
| GTM     | 8.8       | 1               |               | Demographic and Health Surveys                                                                                                                       |
| GUF     | 13.3      | 1               | 2007          | United Nations Population Division                                                                                                                   |
| GUM     | 9.0       | 1               | 2004          | United Nations Population Division                                                                                                                   |
| GUY     | 9.5       | 1               |               | Multiple Indicator Cluster Surveys                                                                                                                   |
| HKG     | 14.1      | 3               |               | National Bureau of Statistics (or Ministry)                                                                                                          |
| HND     | 7.9       | 1               |               | Demographic and Health Surveys                                                                                                                       |
| HRV     | 15.6      | 5               |               | United Nations Population Division                                                                                                                   |
| HTI     | 17.2      | 1               |               | Demographic and Health Surveys                                                                                                                       |
| HUN     | 16.4      | 5               |               | National Bureau of Statistics (or Ministry)                                                                                                          |
| IDN     | 8.1       | 1               |               | Demographic and Health Surveys                                                                                                                       |
| IND     | 8.2       | 1               |               | Demographic and Health Surveys                                                                                                                       |
| IRL     | 17.4      | 2               |               | National Bureau of Statistics (or Ministry)                                                                                                          |
| IRN     | 13.6      | 3               |               | National Bureau of Statistics (or Ministry)                                                                                                          |
| IRQ     | 14.3      | 1               |               | Multiple Indicator Cluster Surveys                                                                                                                   |
| ISL     | 14.7      | 5               |               | National Bureau of Statistics (or Ministry)                                                                                                          |
| ISR     | 23.0      | 3               |               | United Nations Population Division                                                                                                                   |
| ITA     | 16.0      | 1               |               | National Bureau of Statistics (or Ministry)                                                                                                          |
| JAM     | 10.7      | 1               | 2006          | United Nations Population Division                                                                                                                   |
| JOR     | 16.7      | 1               |               | Demographic and Health Surveys                                                                                                                       |
| JPN     | 9.6       | 5               |               | National Bureau of Statistics (or Ministry)                                                                                                          |
| KAZ     | 6.6       | 2               |               | United Nations Population Division                                                                                                                   |
| KEN     | 14.1      | 1               |               | Demographic and Health Surveys                                                                                                                       |
| KGZ     | 9.8       | 1               |               | Demographic and Health Surveys                                                                                                                       |
| KHM     | 9.5       | 1               |               | Demographic and Health Surveys                                                                                                                       |
| KOR     | 15.4      | 5               |               | United Nations Population Division                                                                                                                   |
| KSO     | 18.9      | 1               |               | Multiple Indicator Cluster Surveys                                                                                                                   |
| LAO     | 5.4       | 1               |               | Multiple Indicator Cluster Surveys                                                                                                                   |
| LBN     | 19.8      | 1               |               | National Bureau of Statistics (or Ministry)                                                                                                          |
| LBR     | 20.7      | 1               |               | Demographic and Health Surveys                                                                                                                       |
| LIE     | 24.7      | 3               |               | National Bureau of Statistics (or Ministry)                                                                                                          |
| LKA     | 9.2       | 1               |               | National Bureau of Statistics (or Ministry)                                                                                                          |
| LSO     | 13.8      | 1               |               | Demographic and Health Surveys                                                                                                                       |

(continued)

**Supplementary Table SII Continued**

| Country | Twin rate | # years/surveys | Outside range | Source                                                                                                                                               |
|---------|-----------|-----------------|---------------|------------------------------------------------------------------------------------------------------------------------------------------------------|
| LTU     | 11.6      | 3               |               | National Bureau of Statistics (or Ministry)                                                                                                          |
| LUX     | 16.3      | 3               |               | National Bureau of Statistics (or Ministry)                                                                                                          |
| LVA     | 12.4      | 3               |               | National Bureau of Statistics (or Ministry)                                                                                                          |
| MAC     | 14.1      | 3               |               | National Bureau of Statistics (or Ministry)                                                                                                          |
| MAR     | 13.4      | 1               | 2003          | Demographic and Health Surveys and Smits, J. & Monden, C. W. S. Twinning across the Developing World. PLoS ONE 6, doi: 10.1371/journal.pone.0025239. |
| MDA     | 10.6      | 3               |               | United Nations Population Division                                                                                                                   |
| MDG     | 9.6       | 1               |               | Demographic and Health Surveys                                                                                                                       |
| MDV     | 7.4       | 4               |               | United Nations Population Division                                                                                                                   |
| MEX     | 11.4      | 3               |               | National Bureau of Statistics (or Ministry)                                                                                                          |
| MKD     | 15.5      | 3               |               | United Nations Population Division                                                                                                                   |
| MLI     | 16.5      | 1               |               | Demographic and Health Surveys                                                                                                                       |
| MLT     | 16.6      | 5               |               | United Nations Population Division                                                                                                                   |
| MMR     | 7.8       | 1               |               | Demographic and Health Surveys                                                                                                                       |
| MNE     | 8.2       | 1               | 2009          | United Nations Population Division                                                                                                                   |
| MNG     | 12.6      | 1               |               | Multiple Indicator Cluster Surveys                                                                                                                   |
| MOZ     | 20.4      | 1               |               | Demographic and Health Surveys                                                                                                                       |
| MRT     | 18.1      | 1               |               | Demographic and Health Surveys                                                                                                                       |
| MTQ     | 14.4      | 1               | 2007          | United Nations Population Division                                                                                                                   |
| MUS     | 7.4       | 6               |               | United Nations Population Division                                                                                                                   |
| MWI     | 20.9      | 1               |               | Multiple Indicator Cluster Surveys                                                                                                                   |
| MYS     | 8.3       | 2               |               | United Nations Population Division                                                                                                                   |
| NAM     | 13.6      | 1               |               | Demographic and Health Surveys                                                                                                                       |
| NER     | 16.6      | 1               |               | Demographic and Health Surveys                                                                                                                       |
| NGA     | 17.1      | 1               |               | Demographic and Health Surveys                                                                                                                       |
| NIC     | 8.0       | 1               |               | Nicaragua National demographic Health Survey 2011                                                                                                    |
| NLD     | 16.3      | 3               |               | National Bureau of Statistics (or Ministry)                                                                                                          |
| NOR     | 16.5      | 3               |               | National Bureau of Statistics (or Ministry)                                                                                                          |
| NPL     | 7.5       | 1               |               | Demographic and Health Surveys                                                                                                                       |
| NZL     | 14.3      | 4               |               | National Bureau of Statistics (or Ministry)                                                                                                          |
| PAK     | 10.5      | 1               |               | Demographic and Health Surveys                                                                                                                       |
| PAN     | 8.7       | 4               |               | United Nations Population Division                                                                                                                   |
| PER     | 7.2       | 1               |               | Demographic and Health Surveys                                                                                                                       |
| PHL     | 8.2       | 1               |               | Demographic and Health Surveys                                                                                                                       |
| POL     | 13.2      | 3               |               | National Bureau of Statistics (or Ministry)                                                                                                          |
| PRI     | 10.3      | 1               | 2008          | United Nations Population Division                                                                                                                   |
| PRT     | 15.1      | 3               |               | National Bureau of Statistics (or Ministry)                                                                                                          |
| PRY     | 11.2      | 1               | 2008          | Paraguay Reproductive Health Survey 2008                                                                                                             |
| PSE     | 16.8      | 1               |               | Multiple Indicator Cluster Surveys                                                                                                                   |
| QAT     | 8.1       | 1               |               | National Bureau of Statistics (or Ministry)                                                                                                          |
| REU     | 11.5      | 1               | 2007          | United Nations Population Division                                                                                                                   |
| ROU     | 9.5       | 5               |               | United Nations Population Division                                                                                                                   |
| RUS     | 9.8       | 3               |               | National Bureau of Statistics (or Ministry)                                                                                                          |
| RWA     | 14.0      | 1               |               | Demographic and Health Surveys                                                                                                                       |
| SAU     | 4.9       | 1               |               | AlBasri et al Saudi Med J. 2017 Jun; 38(6):657-661. doi: 10.15537/smj.2017.6.17699                                                                   |

(continued)

**Supplementary Table SII Continued**

| Country | Twin rate | # years/surveys | Outside range | Source                                      |
|---------|-----------|-----------------|---------------|---------------------------------------------|
| SDN     | 16.5      | 1               |               | Multiple Indicator Cluster Surveys          |
| SEN     | 20.6      | 1               |               | Demographic and Health Surveys              |
| SGP     | 13.8      | 5               |               | United Nations Population Division          |
| SLE     | 19.4      | 1               |               | Demographic and Health Surveys              |
| SLV     | 9.1       | 1               |               | Multiple Indicator Cluster Surveys          |
| SOM     | 9.9       | 1               |               | Multiple Indicator Cluster Surveys          |
| SON     | 13.6      | 1               |               | Multiple Indicator Cluster Surveys          |
| SOS     | 14.1      | 1               |               | Multiple Indicator Cluster Surveys          |
| SRB     | 16.7      | 5               |               | National Bureau of Statistics (or Ministry) |
| SSD     | 24.8      | 1               |               | Multiple Indicator Cluster Surveys          |
| STP     | 17.2      | 1               |               | Demographic and Health Surveys              |
| SVK     | 14.1      | 5               |               | United Nations Population Division          |
| SVN     | 17.6      | 5               |               | National Bureau of Statistics (or Ministry) |
| SWE     | 14.0      | 4               |               | National Bureau of Statistics (or Ministry) |
| SWZ     | 14.3      | 1               |               | Demographic and Health Surveys              |
| TCD     | 14.1      | 1               |               | Demographic and Health Surveys              |
| TGO     | 23.9      | 1               |               | Demographic and Health Surveys              |
| TJK     | 9.7       | 1               |               | Demographic and Health Surveys              |
| TKM     | 11.4      | 1               |               | Multiple Indicator Cluster Surveys          |
| TLS     | 9.8       | 1               |               | Demographic and Health Surveys              |
| TTO     | 11.1      | 1               | 2009          | United Nations Population Division          |
| TUN     | 20.5      | 1               |               | Pan Arab Project for Family Health Surveys  |
| TUR     | 13.2      | 1               |               | Demographic and Health Surveys              |
| TWN     | 15.9      | 5               |               | National Bureau of Statistics (or Ministry) |
| TZA     | 17.2      | 1               |               | Demographic and Health Surveys              |
| UGA     | 16.3      | 1               |               | Demographic and Health Surveys              |
| UKR     | 9.6       | 3               |               | National Bureau of Statistics (or Ministry) |
| URY     | 12.4      | 2               |               | United Nations Population Division          |
| USA     | 16.9      | 3               |               | National Bureau of Statistics (or Ministry) |
| UZB     | 7.9       | 2               |               | United Nations Population Division          |
| VEN     | 5.1       | 1               | 2007          | United Nations Population Division          |
| VNM     | 8.3       | 1               |               | Multiple Indicator Cluster Surveys          |
| YEM     | 9.2       | 1               |               | Demographic and Health Surveys              |
| ZAF     | 15.8      | 1               |               | Demographic and Health Surveys              |
| ZMB     | 15.6      | 1               |               | Demographic and Health Surveys              |
| ZWE     | 16.9      | 1               |               | Demographic and Health Surveys              |
