# Supplementary material for: Twin Peaks: more twinning in humans than ever before
Source: PubMed Central journal article supplement — Hum Reprod. 2021 Mar 12;36(6):1666–73. doi: 10.1093/humrep/deab029 (PMC8129593; doi:10.1093/humrep/deab029), 2021-03-12
Supplement: deab029_supplementary_table_iii.pdf [file deab029_supplementary_table_iii.pdf]

Supplementary Table SIII Sources and twin rates by country for 1980–1985.

| Country | TWIN rate | # years/surveys | Outside range | Source                                                                                                                                                                                                                        |
|---------|-----------|-----------------|---------------|-------------------------------------------------------------------------------------------------------------------------------------------------------------------------------------------------------------------------------|
| AUS     | 10.1      | 6               |               | United Nations Population Division                                                                                                                                                                                            |
| AUT     | 8.9       | 6               |               | National Bureau of Statistics (or Ministry)                                                                                                                                                                                   |
| BDI     | 13.2      | 1               |               | Demographic and Health Surveys                                                                                                                                                                                                |
| BEL     | 10.9      | 4               |               | National Bureau of Statistics (or Ministry)                                                                                                                                                                                   |
| BEN     | 25.6      | 1               |               | Demographic and Health Surveys                                                                                                                                                                                                |
| BFA     | 17.1      | 1               |               | Demographic and Health Surveys                                                                                                                                                                                                |
| BGR     | 6.5       | 6               |               | National Bureau of Statistics (or Ministry)                                                                                                                                                                                   |
| BHR     | 4.4       | 6               |               | United Nations Population Division                                                                                                                                                                                            |
| BLR     | 6.9       | 6               |               | National Bureau of Statistics (or Ministry)                                                                                                                                                                                   |
| BRA     | 8.5       | 2               |               | National Bureau of Statistics (or Ministry)                                                                                                                                                                                   |
| CAN     | 9.4       | 6               |               | Imaizumi, Y. (2014). "Trends of Twinning Rates in Ten Countries, 1972-1996." <i>Acta Genet Med Gemellol</i> 46(4): 209-218. <a href="https://doi.org/10.1017/S0001566000000441">https://doi.org/10.1017/S0001566000000441</a> |
| CHE     | 9.7       | 6               |               | National Bureau of Statistics (or Ministry)                                                                                                                                                                                   |
| CHL     | 9.4       | 6               |               | United Nations Population Division                                                                                                                                                                                            |
| CHN     | 6.1       | 1               |               | China Fertility Survey 1982                                                                                                                                                                                                   |
| CIV     | 22.0      | 1               |               | Demographic and Health Surveys                                                                                                                                                                                                |
| CMR     | 22.6      | 1               |               | Demographic and Health Surveys                                                                                                                                                                                                |
| COD     | 18.0      | 1               |               | Demographic and Health Surveys                                                                                                                                                                                                |
| COG     | 21.7      | 1               |               | Demographic and Health Surveys                                                                                                                                                                                                |
| COL     | 8.2       | 1               |               | Smits, J. & Monden, C. W. S. Twinning across the Developing World. <i>PLoS ONE</i> 6, doi: 10.1371/journal.pone.0025239.                                                                                                      |
| COM     | 21.7      | 1               |               | Demographic and Health Surveys                                                                                                                                                                                                |
| CUB     | 6.6       | 6               |               | United Nations Population Division                                                                                                                                                                                            |
| CYP     | 9.8       | 6               |               | United Nations Population Division                                                                                                                                                                                            |
| CZE     | 9.3       | 6               |               | National Bureau of Statistics (or Ministry)                                                                                                                                                                                   |
| DEU     | 9.5       | 6               |               | National Bureau of Statistics (or Ministry)                                                                                                                                                                                   |
| DMA     | 7.5       | 1               | 1987          | United Nations Population Division                                                                                                                                                                                            |
| DNK     | 10.4      | 6               |               | National Bureau of Statistics (or Ministry)                                                                                                                                                                                   |
| ECU     | 9.6       | 1               |               | Smits, J. & Monden, C. W. S. Twinning across the Developing World. <i>PLoS ONE</i> 6, doi: 10.1371/journal.pone.0025239.                                                                                                      |
| EGY     | 17.7      | 1               |               | Smits, J. & Monden, C. W. S. Twinning across the Developing World. <i>PLoS ONE</i> 6, doi: 10.1371/journal.pone.0025239.                                                                                                      |
| ERI     | 14.7      | 1               |               | Demographic and Health Surveys                                                                                                                                                                                                |
| ESH     | 12.1      | 1               |               | Smits, J. & Monden, C. W. S. Twinning across the Developing World. <i>PLoS ONE</i> 6, doi: 10.1371/journal.pone.0025239.                                                                                                      |
| ESP     | 8.2       | 4               |               | United Nations Population Division                                                                                                                                                                                            |
| EST     | 8.0       | 6               |               | National Bureau of Statistics (or Ministry)                                                                                                                                                                                   |
| ETH     | 12.5      | 1               |               | Demographic and Health Surveys                                                                                                                                                                                                |
| FIN     | 10.7      | 6               |               | National Bureau of Statistics (or Ministry)                                                                                                                                                                                   |

(continued)

**Supplementary Table SIII Continued**

| Country | TWIN rate | # years/surveys | Outside range | Source                                                                                                                                                                                                                        |
|---------|-----------|-----------------|---------------|-------------------------------------------------------------------------------------------------------------------------------------------------------------------------------------------------------------------------------|
| FRA     | 10.1      | 6               |               | National Bureau of Statistics (or Ministry)                                                                                                                                                                                   |
| GAB     | 19.3      | 1               |               | Demographic and Health Surveys                                                                                                                                                                                                |
| GBR     | 10.1      | 5               |               | National Bureau of Statistics (or Ministry)                                                                                                                                                                                   |
| GHA     | 21.5      | 1               |               | Multiple Indicator Cluster Surveys                                                                                                                                                                                            |
| GIN     | 23.2      | 1               |               | Demographic and Health Surveys                                                                                                                                                                                                |
| GMB     | 15.8      | 1               |               | Demographic and Health Surveys                                                                                                                                                                                                |
| GRC     | 9.5       | 6               |               | National Bureau of Statistics (or Ministry)                                                                                                                                                                                   |
| GTM     | 4.4       | 1               | 1989          | United Nations Population Division                                                                                                                                                                                            |
| GUM     | 7.9       | 4               |               | United Nations Population Division                                                                                                                                                                                            |
| HKG     | 7.2       | 6               |               | Imaizumi, Y. (2014). "Trends of Twinning Rates in Ten Countries, 1972-1996." <i>Acta Genet Med Gemellol</i> 46(4): 209-218. <a href="https://doi.org/10.1017/S0001566000000441">https://doi.org/10.1017/S0001566000000441</a> |
| HRV     | 9.8       | 6               |               | National Bureau of Statistics (or Ministry)                                                                                                                                                                                   |
| HTI     | 14.1      | 1               |               | Smits, J. & Monden, C. W. S. Twinning across the Developing World. <i>PLoS ONE</i> 6, doi: 10.1371/journal.pone.0025239.                                                                                                      |
| HUN     | 10.4      | 6               |               | National Bureau of Statistics (or Ministry)                                                                                                                                                                                   |
| IND     | 7.2       | 1               |               | Smits, J. & Monden, C. W. S. Twinning across the Developing World. <i>PLoS ONE</i> 6, doi: 10.1371/journal.pone.0025239.                                                                                                      |
| IRL     | 10.7      | 6               |               | National Bureau of Statistics (or Ministry)                                                                                                                                                                                   |
| ISL     | 10.1      | 6               |               | National Bureau of Statistics (or Ministry)                                                                                                                                                                                   |
| ISR     | 10.0      | 4               |               | United Nations Population Division                                                                                                                                                                                            |
| ITA     | 9.2       | 6               |               | National Bureau of Statistics (or Ministry)                                                                                                                                                                                   |
| JAM     | 7.7       | 5               |               | United Nations Population Division                                                                                                                                                                                            |
| JPN     | 6.5       | 6               |               | Imaizumi, Y. (2014). "Trends of Twinning Rates in Ten Countries, 1972-1996." <i>Acta Genet Med Gemellol</i> 46(4): 209-218. <a href="https://doi.org/10.1017/S0001566000000441">https://doi.org/10.1017/S0001566000000441</a> |
| KAZ     | 7.2       | 1               | 1987          | United Nations Population Division                                                                                                                                                                                            |
| KEN     | 14.3      | 1               |               | Demographic and Health Surveys                                                                                                                                                                                                |
| KOR     | 5.0       | 3               |               | United Nations Population Division                                                                                                                                                                                            |
| LBR     | 19.4      | 1               |               | Demographic and Health Surveys                                                                                                                                                                                                |
| LBY     | 4.1       | 1               |               | United Nations Population Division                                                                                                                                                                                            |
| LKA     | 6.3       | 1               |               | United Nations Population Division                                                                                                                                                                                            |
| LSO     | 12.9      | 1               |               | Demographic and Health Surveys                                                                                                                                                                                                |
| LTU     | 7.7       | 6               |               | National Bureau of Statistics (or Ministry)                                                                                                                                                                                   |
| LUX     | 9.4       | 6               |               | National Bureau of Statistics (or Ministry)                                                                                                                                                                                   |
| LVA     | 7.1       | 6               |               | National Bureau of Statistics (or Ministry)                                                                                                                                                                                   |
| MAC     | 5.3       | 3               |               | National Bureau of Statistics (or Ministry)                                                                                                                                                                                   |
| MAR     | 12.1      | 1               |               | Smits, J. & Monden, C. W. S. Twinning across the Developing World. <i>PLoS ONE</i> 6, doi: 10.1371/journal.pone.0025239.                                                                                                      |
| MDA     | 8.5       | 1               | 1987          | United Nations Population Division                                                                                                                                                                                            |
| MDG     | 9.6       | 1               |               | Demographic and Health Surveys                                                                                                                                                                                                |
| MEX     | 9.5       | 1               |               | National Bureau of Statistics (or Ministry)                                                                                                                                                                                   |
| MKD     | 8.5       | 1               | 1989          | United Nations Population Division                                                                                                                                                                                            |
| MLI     | 15.8      | 1               |               | Demographic and Health Surveys                                                                                                                                                                                                |
| MLT     | 10.6      | 6               |               | United Nations Population Division                                                                                                                                                                                            |
| MOZ     | 18.8      | 1               |               | Demographic and Health Surveys                                                                                                                                                                                                |

(continued)

**Supplementary Table SIII Continued**

| Country | TWIN rate | # years/surveys | Outside range | Source                                                                                                                   |
|---------|-----------|-----------------|---------------|--------------------------------------------------------------------------------------------------------------------------|
| MRT     | 15.8      | 1               |               | Demographic and Health Surveys                                                                                           |
| MWI     | 18.9      | 1               |               | Multiple Indicator Cluster Surveys                                                                                       |
| NAM     | 13.7      | 1               |               | Demographic and Health Surveys                                                                                           |
| NER     | 16.7      | 1               |               | Demographic and Health Surveys                                                                                           |
| NGA     | 18.5      | 1               |               | Demographic and Health Surveys                                                                                           |
| NLD     | 11.0      | 6               |               | National Bureau of Statistics (or Ministry)                                                                              |
| NOR     | 9.7       | 6               |               | National Bureau of Statistics (or Ministry)                                                                              |
| NZL     | 10.5      | 6               |               | National Bureau of Statistics (or Ministry)                                                                              |
| PAK     | 9.7       | 1               |               | Smits, J. & Monden, C. W. S. Twinning across the Developing World. <i>PLoS ONE</i> 6, doi: 10.1371/journal.pone.0025239. |
| PAN     | 7.4       | 6               |               | United Nations Population Division                                                                                       |
| POL     | 9.5       | 6               |               | National Bureau of Statistics (or Ministry)                                                                              |
| PRI     | 7.5       | 6               |               | United Nations Population Division                                                                                       |
| PRT     | 7.9       | 6               |               | United Nations Population Division                                                                                       |
| PRY     | 9.9       | 1               |               | Smits, J. & Monden, C. W. S. Twinning across the Developing World. <i>PLoS ONE</i> 6, doi: 10.1371/journal.pone.0025239. |
| QAT     | 2.5       | 2               |               | National Bureau of Statistics (or Ministry)                                                                              |
| RUS     | 8.2       | 2               |               | National Bureau of Statistics (or Ministry)                                                                              |
| RWA     | 14.1      | 1               |               | Demographic and Health Surveys                                                                                           |
| SDN     | 14.9      | 1               |               | Smits, J. & Monden, C. W. S. Twinning across the Developing World. <i>PLoS ONE</i> 6, doi: 10.1371/journal.pone.0025239. |
| SEN     | 17.6      | 1               |               | Demographic and Health Surveys                                                                                           |
| SGP     | 6.4       | 6               |               | United Nations Population Division                                                                                       |
| SLE     | 18.6      | 1               |               | Demographic and Health Surveys                                                                                           |
| SLV     | 9.1       | 6               |               | United Nations Population Division                                                                                       |
| SVK     | 8.7       | 1               | 1988          | United Nations Population Division                                                                                       |
| SVN     | 10.8      | 1               |               | National Bureau of Statistics (or Ministry)                                                                              |
| SWE     | 9.5       | 6               |               | National Bureau of Statistics (via Jan Hoem)                                                                             |
| SWZ     | 13.8      | 1               |               | Demographic and Health Surveys                                                                                           |
| TCD     | 14.8      | 1               |               | Demographic and Health Surveys                                                                                           |
| TGO     | 21.6      | 1               |               | Demographic and Health Surveys                                                                                           |
| THA     | 6.8       | 1               |               | Smits, J. & Monden, C. W. S. Twinning across the Developing World. <i>PLoS ONE</i> 6, doi: 10.1371/journal.pone.0025239. |
| TJK     | 3.7       | 1               | 1989          | United Nations Population Division                                                                                       |
| TTO     | 7.5       | 3               |               | United Nations Population Division                                                                                       |
| TUN     | 14.3      | 1               |               | Smits, J. & Monden, C. W. S. Twinning across the Developing World. <i>PLoS ONE</i> 6, doi: 10.1371/journal.pone.0025239. |
| TUR     | 9.9       | 1               |               | Smits, J. & Monden, C. W. S. Twinning across the Developing World. <i>PLoS ONE</i> 6, doi: 10.1371/journal.pone.0025239. |
| TZA     | 17.7      | 1               |               | Demographic and Health Surveys                                                                                           |
| UGA     | 16.0      | 1               |               | Demographic and Health Surveys                                                                                           |
| URY     | 8.3       | 4               |               | United Nations Population Division                                                                                       |
| USA     | 9.9       | 6               |               | National Bureau of Statistics (or Ministry)                                                                              |
| VEN     | 7.4       | 1               | 1987          | United Nations Population Division                                                                                       |
| YEM     | 9.8       | 1               |               |                                                                                                                          |

(continued)

**Supplementary Table SIII Continued**

| Country | TWIN rate | # years/surveys | Outside range | Source                                                                                                                           |
|---------|-----------|-----------------|---------------|----------------------------------------------------------------------------------------------------------------------------------|
|         |           |                 |               | Smits, J. & Monden, C. W. S. Twinning across the Developing World. <i>PLoS ONE</i> <b>6</b> , doi: 10.1371/journal.pone.0025239. |
| ZAF     | 10.3      |                 |               | Demographic and Health Surveys                                                                                                   |
| ZMB     | 18.0      |                 |               | Demographic and Health Surveys                                                                                                   |
| ZWE     | 15.8      |                 |               | Demographic and Health Surveys                                                                                                   |
