# Supplementary figures and images for: Twin Peaks: more twinning in humans than ever before
Source: PubMed Central journal article supplement — Hum Reprod. 2021 Mar 12;36(6):1666–73. doi: 10.1093/humrep/deab029 (PMC8129593; doi:10.1093/humrep/deab029), 2021-03-12

1980-1985

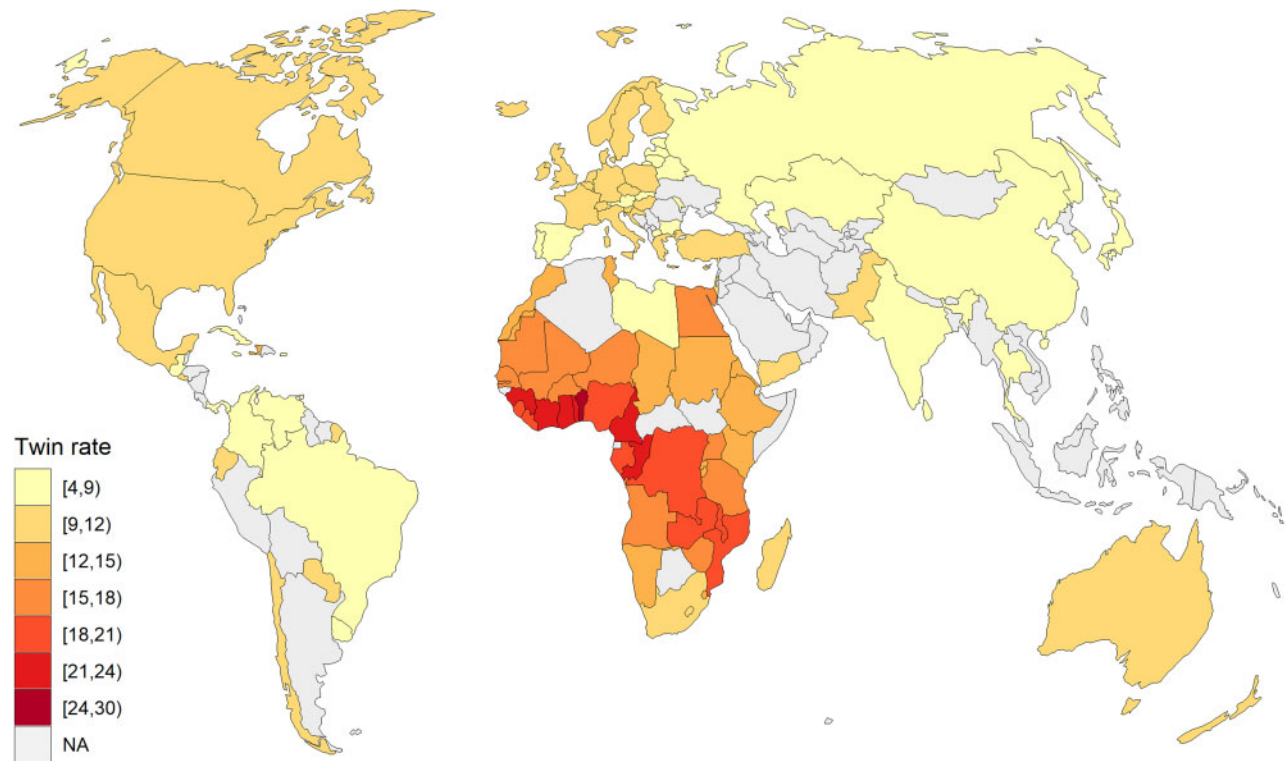

Supplementary Figure S1. Twin deliveries per 1000 total deliveries in 1980–1985.

Supplement: deab029_supplementary_figure_i.pdf [file deab029_supplementary_figure_i.pdf]
